# Supplementary material
Source: publisher figshare collection journal article supplement (https://acs.figshare.com/ndownloader/files/8956702)
Supplement: Supplementary file 1 [file 8956702]

## SUPPORT INFORMATION

### Synthesis of Micropillar Arrays via Photopolymerization: An In Situ study of Light-Induced Formation, Growth Kinetics and the Influence of Oxygen Inhibition

Fu Hao Chen<sup>1</sup>, Shreyas Pathreker<sup>1</sup>, Saeid Biria<sup>1</sup>, Ian D. Hosein<sup>1</sup>

1. Department of Biomedical and Chemical Engineering, Syracuse University, Syracuse, NY, 13244, United States

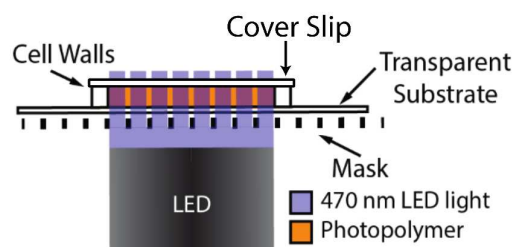

Figure S1. Schematic of the closed system, which consists of a cover slip to protect the photoresin from the ambient environment, which eliminates the oxygen inhibition.

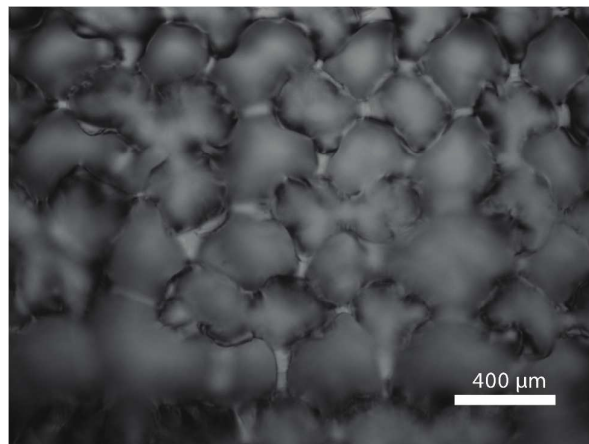

Figure S1. Top view of pillars for the closed system, 40/400  $\mu\text{m}$ , 15  $\text{mW}/\text{cm}^2$  for 5min, 5  $\text{mW}/\text{cm}^2$  for 40min.

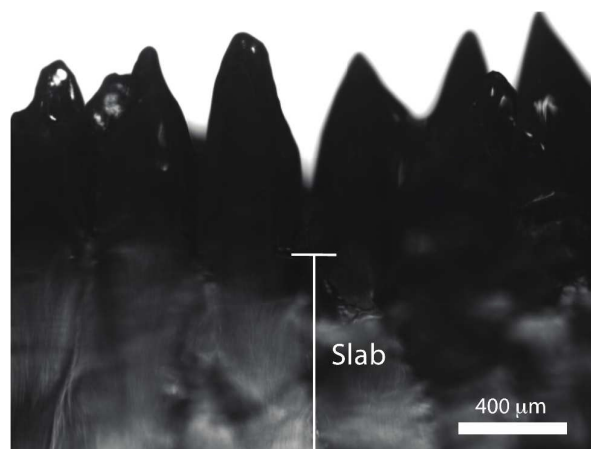

Figure S2. Side view of pillars for the closed system, 40/400  $\mu\text{m}$ , 15  $\text{mW}/\text{cm}^2$  for 5min, 5  $\text{mW}/\text{cm}^2$  40min. A thick gelled slab is formed under the pillars.

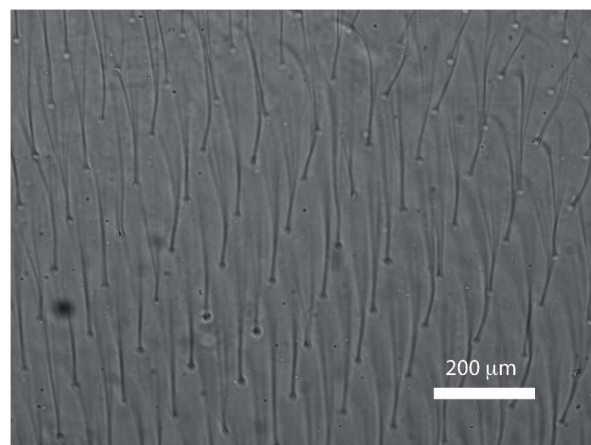

Figure S3. Top view for pillars formed in resins with 0.3 wt% hydroquinone. Mask 10/100  $\mu\text{m}$ , closed system, 15  $\text{mW}/\text{cm}^2$  for 5min, 5  $\text{mW}/\text{cm}^2$  40min. The pillars are embedded in a gelled slab.

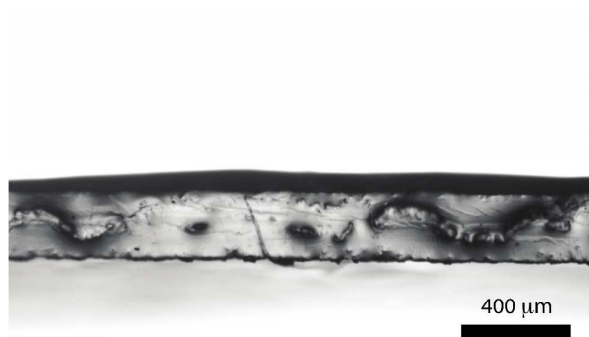

Figure S4. Side view of cured resin with 0.3 wt% hydroquinone. Mask is 10/100  $\mu\text{m}$ , closed system, 15  $\text{mW}/\text{cm}^2$  for 5min, 5  $\text{mW}/\text{cm}^2$  40min. Pillars are buried in a slab of gelled TMPTA.
